# Supplementary material for: Biocomposite Materials Derived from Andropogon halepensis: Eco-Design and Biophysical Evaluation
Source: MDPI journal article supplement (doi:10.3390/ma17051225), 2024-03-06
Supplement: s1 [file s1]

# Biocomposite Materials Derived from *Andropogon halepensis* – Eco-design and Biophysical Evaluation

M.-E. Barbinta-Patrascu<sup>1</sup>, C. Nichita<sup>2,3\*</sup>, B. Bită<sup>1,4</sup>, S. Antohe<sup>1,5\*</sup>

- <sup>1</sup> Department of Electricity, Solid-State Physics and Biophysics, Faculty of Physics, University of Bucharest, 405 Atomistilor Street, 077125 Magurele, Romania; marcela.barbinta@unibuc.ro (M.-E.B.-P.); bogdan.bită@fizica.unibuc.ro (B.B.)
- <sup>2</sup> CTT-3Nano-SAE Research Center, Faculty of Physics, ICUB, University of Bucharest, MG-38, 405 Atomistilor Street, 077125 Magurele, Romania
- <sup>3</sup> National Institute for Chemical-Pharmaceutical Research and Development, 112 Vitan Avenue, 031299 Bucharest, Romania
- <sup>4</sup> National Institute for Lasers, Plasma and Radiation Physics, Magurele, 77125 Bucharest, Romania
- <sup>5</sup> Academy of Romanian Scientists, Ilfov Street 3, 050045 Bucharest, Romania
- \* Correspondence: santohe@solid.fizica.unibuc.ro or s\_antophe@yahoo.com (S.A.); cornelia.nichita@unibuc.ro or cornelianichita@yahoo.com (C.N.)

**Table S1.** FTIR ATR band assignment for vegetal extract and phyto-derived metallic nanoparticles

| Sample | FT-IR Bands (cm <sup>-1</sup> )   | Assignment                                                                                                                                                                 | Ref.       |
|--------|-----------------------------------|----------------------------------------------------------------------------------------------------------------------------------------------------------------------------|------------|
| EAh    | 3277<br>(sharp, narrow, strong)   | O–H bending and stretching vibrations of hydroxyl groups belonging to phenolic compounds and polysaccharides;<br>Stretching vibrations of the primary and secondary amines | [1]<br>[2] |
|        | 2920 (weak)                       | C–H anti-symmetric stretching vibration                                                                                                                                    | [2]        |
|        | 2845 (weak)                       | C–H symmetrical stretch vibration of alkyl chains                                                                                                                          | [2]        |
|        | 1645 (shoulder),<br>1585 (strong) | Amide I, due to carbonyl stretch in proteins; Carboxylate groups (–COO <sup>−</sup> ); Stretching C=C (aromatic ring); Secondary amine, N–H bend                           | [1]<br>[2] |
|        | 1517 (weak, sharp)                | Amide II due to N–H bending and C–N stretching in proteins                                                                                                                 | [3]<br>[4] |
|        | 1369<br>(medium, sharp)           | Carboxylates; Phenol or tertiary alcohol, O–H bend; Primary or secondary, O–H in-plane bend; C–H bend                                                                      | [2]        |
|        | 1261 (weak)                       | Primary or secondary O–H in-plan bend; Aromatic ethers, aryl–O stretch; Aromatic primary amine, C–N stretch                                                                | [2]        |

|                   |                                         |                                                                                                                                                                                                                              |            |
|-------------------|-----------------------------------------|------------------------------------------------------------------------------------------------------------------------------------------------------------------------------------------------------------------------------|------------|
|                   | 1030<br>(strong, sharp)                 | Cyclic ethers, large rings, C–O stretch; –C–O–C– ether<br>Antisymmetric stretching of –C–O group of polysaccharides and/or chlorophyll;<br>C–O bending in esters; Secondary alcohol, C–O stretch; Primary amine, C–N stretch | [1]<br>[2] |
| AgNPs_1n/AgNPs_1o | 3286/3270<br>(sharp, strong)            | O–H stretching alcohols, polysaccharides and phenolic compounds/ polyphenols;<br>Stretching vibrations of the primary and secondary amines                                                                                   | [1]<br>[2] |
|                   | 2925/2930 (weak)                        | C–H anti-symmetric stretching vibration                                                                                                                                                                                      | [2]        |
|                   | 2851/2880<br>(shoulder)                 | C–H symmetrical stretch vibration of alkyl chains                                                                                                                                                                            | [2]        |
|                   | 1591/1585<br>(strong, sharp)            | Amide I, due to carbonyl stretch in proteins; Carboxylate groups (–COO <sup>−</sup> );<br>Stretching C=C (aromatic ring); Primary amine, N–H bend                                                                            | [1]<br>[2] |
|                   | 1512/1517<br>(weak, sharp)              | Amide II, due to N–H bending and C–N stretching in proteins                                                                                                                                                                  | [3]<br>[4] |
|                   | 1398/1394<br>(medium, sharp)            | Carboxylates; Phenol or tertiary alcohol, O–H bend; Primary or secondary, O–H<br>in-plane bend; C–H bend                                                                                                                     | [2]        |
|                   | 1261/1265<br>(shoulder)                 | Aromatic primary amine, C–N stretch;<br>Primary or secondary O–H in-plane bend; Aromatic ethers, aryl–O stretch                                                                                                              | [2]        |
|                   | 1030/1035<br>(strong, sharp)            | Cyclic ethers, large rings, C–O stretch; –C–O–C– ether<br>Antisymmetric stretching of –C–O group of polysaccharides and/or chlorophyll;<br>C–O bending in esters; Secondary alcohol, C–O stretch; Primary amine, C–N stretch | [1]<br>[2] |
| AgNPs_2n/AgNPs_2o | 3319/ 3348<br>(very broad)              | Very broad intense band overlapping the frequencies of the following groups: Hy-<br>drogen-bonded O–H (the bending and stretching vibrations of hydroxyl groups in<br>alcohols, polysaccharides and phenolic compounds)      | [1]<br>[2] |
|                   | 2930/2920<br>(very weak, sharp)         | C–H anti-symmetric stretching vibration; Transition metal carbonyls                                                                                                                                                          | [2]        |
|                   | 2861/2851<br>(very weak, sharp)         | C–H symmetrical stretch vibration of alkyl chains                                                                                                                                                                            | [2]        |
|                   | 1605/1605<br>(broad, very weak)         | Amide I, arising due to carbonyl stretch in proteins; Carboxylate groups (–COO <sup>−</sup> );<br>Stretching C=C (aromatic ring); Primary amine, N–H bend                                                                    | [1]<br>[2] |
|                   | 1354/1354<br>(medium, broad)            | Carboxylates; Phenol or tertiary alcohol, O–H bend; Primary or secondary, O–H<br>in-plan bend; C–H bend                                                                                                                      | [2]        |
|                   | 1074, 1040/1079,<br>1044<br>(very weak) | Primary amine, C–N stretch; Alkyl-substituted ether; –C–O–C stretching vibration;<br>Primary alcohol, C–O stretch                                                                                                            | [2]<br>[5] |

**Table S2.** FTIR ATR band assignment for untreated and treated spider silk

| Sample                    | FT-IR Bands<br>(cm <sup>-1</sup> )                                   | Assignment                                                                                                                                                                                                                                        | Ref.              |
|---------------------------|----------------------------------------------------------------------|---------------------------------------------------------------------------------------------------------------------------------------------------------------------------------------------------------------------------------------------------|-------------------|
| S/ S_EAh                  | 3332, 3286 (strong narrow band, splitted in 2 bands)/3281(broad)     | Normal “polymeric” OH stretch; bending and stretching vibrations of hydroxyl groups intermolecularly hydrogen bonded, in alcohols, polysaccharides and phenolic compounds/ polyphenols; Stretching vibrations of the primary and secondary amines | [1]<br>[2]        |
|                           | 2910 (broad, medium)/2918 (medium, sharp)                            | C–H anti-symmetric stretching vibration                                                                                                                                                                                                           | [2]               |
|                           | 2854 (shoulder)/ 2852 (weak, sharp)                                  | C–H symmetrical stretch vibration of alkyl chains                                                                                                                                                                                                 | [2]               |
|                           | 1711 (very weak)/ 1714 (strong, sharp)                               | Carboxylates, C=O stretching                                                                                                                                                                                                                      | [6]               |
|                           | 1643 (medium, broad)/ 1655,1601 (medium)                             | Amide I, arising from carbonyl (–C=O) stretch in spider silk proteins                                                                                                                                                                             | [3]               |
|                           | 1515, 1540/1517, 1503 (very weak)                                    | N–H bending belonged to the Amide II regions of spider silk proteins                                                                                                                                                                              | [3]               |
|                           | 1428 (weak, sharp)/ 1450 (weak, broad)                               | C–H bending                                                                                                                                                                                                                                       | [2]               |
|                           | 1409, 1372, 1338, 1315 (weak, broad)/ 1409, 1373, 1341 (weak, sharp) | Phenol or tertiary alcohol, O–H bend ; C–H bend                                                                                                                                                                                                   | [2]               |
|                           | 1278-1239 (very broad, weak)/1260, 1242 (medium)                     | Amide III band in proteins                                                                                                                                                                                                                        | [7]               |
|                           | 1161 (medium, sharp)/ 1155 (shoulder)                                | C–N stretch                                                                                                                                                                                                                                       | [2]               |
|                           | 1106-1031 (sharp)/ 1077 (shoulder), 1019 (strong)                    | C–H and O–H bond vibrations because of the prevalence of hydroxyl amino acid side chains.                                                                                                                                                         | [3]               |
|                           | 898 (weak)/ 897-795 (weak bands), 722 (medium, sharp)                | Hydrogen bonded O–H out-of-plan bending; Aromatic C–H out-of-plan bending                                                                                                                                                                         | [2]               |
|                           | 665 (weak)/ 663 (weak, sharp)                                        | C–H bend; Alcohol, O–H out-of-plan bend                                                                                                                                                                                                           | [2]               |
| S_AgNPs_1n/<br>S_AgNPs_1o | 3332, 3281/3330, 3285 (strong narrow band, splitted in 2 bands)/     | Hydrogen-bonded O–H (the bending and stretching vibrations of hydroxyl groups in alcohols, polysaccharides and phenolic compounds); Stretching vibrations of the primary and secondary amines                                                     | [1]<br>[2]<br>[6] |
|                           | 2918/ 2915 (medium, sharp)                                           | C–H anti-symmetric stretching vibration                                                                                                                                                                                                           | [2]               |
|                           | 2852 (shoulder)/ 2850 (weak,                                         | C–H symmetrical stretch vibration of alkyl chains                                                                                                                                                                                                 | [2]               |

|                        |                                                  |                                                                                                                                                                                                                                       |                   |
|------------------------|--------------------------------------------------|---------------------------------------------------------------------------------------------------------------------------------------------------------------------------------------------------------------------------------------|-------------------|
|                        | sharp)                                           |                                                                                                                                                                                                                                       |                   |
|                        | 1712 (medium, sharp)/ 1709 (shoulder)            | Carboxylates, C=O stretching (in silk proteins)                                                                                                                                                                                       | [6]               |
|                        | 1640 (medium)/ 1634 (strong)                     | Amide I, due to carbonyl (C=O) stretch in silk proteins and in proteins which cover AgNPs                                                                                                                                             | [3]<br>[8]        |
|                        | 1519 (weak, broad)/ 1517 (medium)                | Amide II arising from N-H bending and C-N stretching in proteins                                                                                                                                                                      | [1]<br>[3]<br>[4] |
|                        | 1450, 1429/1452, 1431 (weak bands)               | C-H bending                                                                                                                                                                                                                           | [2]               |
|                        | 1407-1315/ 1409-1317 (weak)                      | Phenol or tertiary alcohol, O-H bend ; C-H bend                                                                                                                                                                                       | [2]               |
|                        | 1242/ 1242 (medium, broad)                       | Amide III band in proteins                                                                                                                                                                                                            | [7]               |
|                        | 1161/1158 (medium, sharp)                        | C-N stretch                                                                                                                                                                                                                           | [2]               |
|                        | 1102-1018/ 1158-1028 (medium bands)              | C-H and O-H bond vibrations because of the prevalence of hydroxyl amino acid side chains.                                                                                                                                             | [3]               |
|                        | 895-793/ 897-845 (weak bands)                    | Hydrogen bonded O-H out-of-plan bending; Aromatic C-H out-of-plane bending                                                                                                                                                            | [2]               |
|                        | 722, 664/ 702, 662 (weak)                        | C-H bend; Alcohol, O-H out-of-plan bend; vibration of Ag...O bond between AgNPs and O-H groups of serine of spider silk proteins                                                                                                      | [2]<br>[9]        |
| S_AgNPs_2n/ S_AgNPs_2o | 3334, 3292/ 3337, 3291 (a splitted band, strong) | Very broad intense band overlapping the frequencies of the following groups: Phenols, O-H stretch; Hydrogen-bonded O-H (the bending and stretching vibrations of hydroxyl groups in alcohols, polysaccharides and phenolic compounds) | [1]<br>[2]        |
|                        | 2918/2917 (medium, sharp)                        | C-H anti-symmetric stretching vibration                                                                                                                                                                                               | [2]               |
|                        | 2852 (medium, sharp)/ 2851 (very weak)           | C-H symmetrical stretch vibration of alkyl chains                                                                                                                                                                                     | [2]               |
|                        | 1714 (strong, sharp)/1715 (very weak)            | Carboxylates, C=O stretching (in silk proteins)                                                                                                                                                                                       | [6]               |
|                        | 1637 (broad, medium)/ 1635 (strong)              | Amide I, arising from carbonyl (C=O) stretch in silk proteins and in proteins which cover AgNPs                                                                                                                                       | [3]<br>[8]        |
|                        | 1517 (medium)/ 1518 (weak)                       | Amide II band due to N-H bending and C-N stretching in proteins                                                                                                                                                                       | [1]<br>[3]<br>[4] |

|  |                                                                                                                 |                                                                                                                                  |            |
|--|-----------------------------------------------------------------------------------------------------------------|----------------------------------------------------------------------------------------------------------------------------------|------------|
|  | 1472 (shoulder), 1454 and 1427 (very weak)/ 1450 and 1432 (very weak)                                           | C–H bending                                                                                                                      | [2]        |
|  | 1409 (weak, sharp), 1370 (weak), 1338 (medium, sharp) and 1315 (weak, sharp)/ 1409, 1338 and 1316 (weak, sharp) | Phenol or tertiary alcohol, O–H bend ; C–H bend                                                                                  | [2]        |
|  | 1245 (strong, sharp)/ 1245 (weak, broad)                                                                        | Amide III band in proteins                                                                                                       | [7]        |
|  | 1160 / 1162 (medium, sharp)                                                                                     | C–N stretch                                                                                                                      | [2]        |
|  | 1104-1018/ 1105-1029 (strong bands)                                                                             | C–H and O–H bond vibrations because of the prevalence of hydroxyl amino acid side chains.                                        | [3]        |
|  | 898-793 (weak bands)/ 899 (weak), 873 (shoulder)                                                                | Hydrogen bonded O–H out-of-plan bending; Aromatic C–H out-of-plane bending                                                       | [2]        |
|  | 722 (medium, sharp), 663 (weak, sharp)/ 704 (very weak, broad), 665 (weak, sharp)                               | C–H bend; Alcohol, O–H out-of-plan bend; vibration of Ag...O bond between AgNPs and O–H groups of serine of spider silk proteins | [2]<br>[9] |

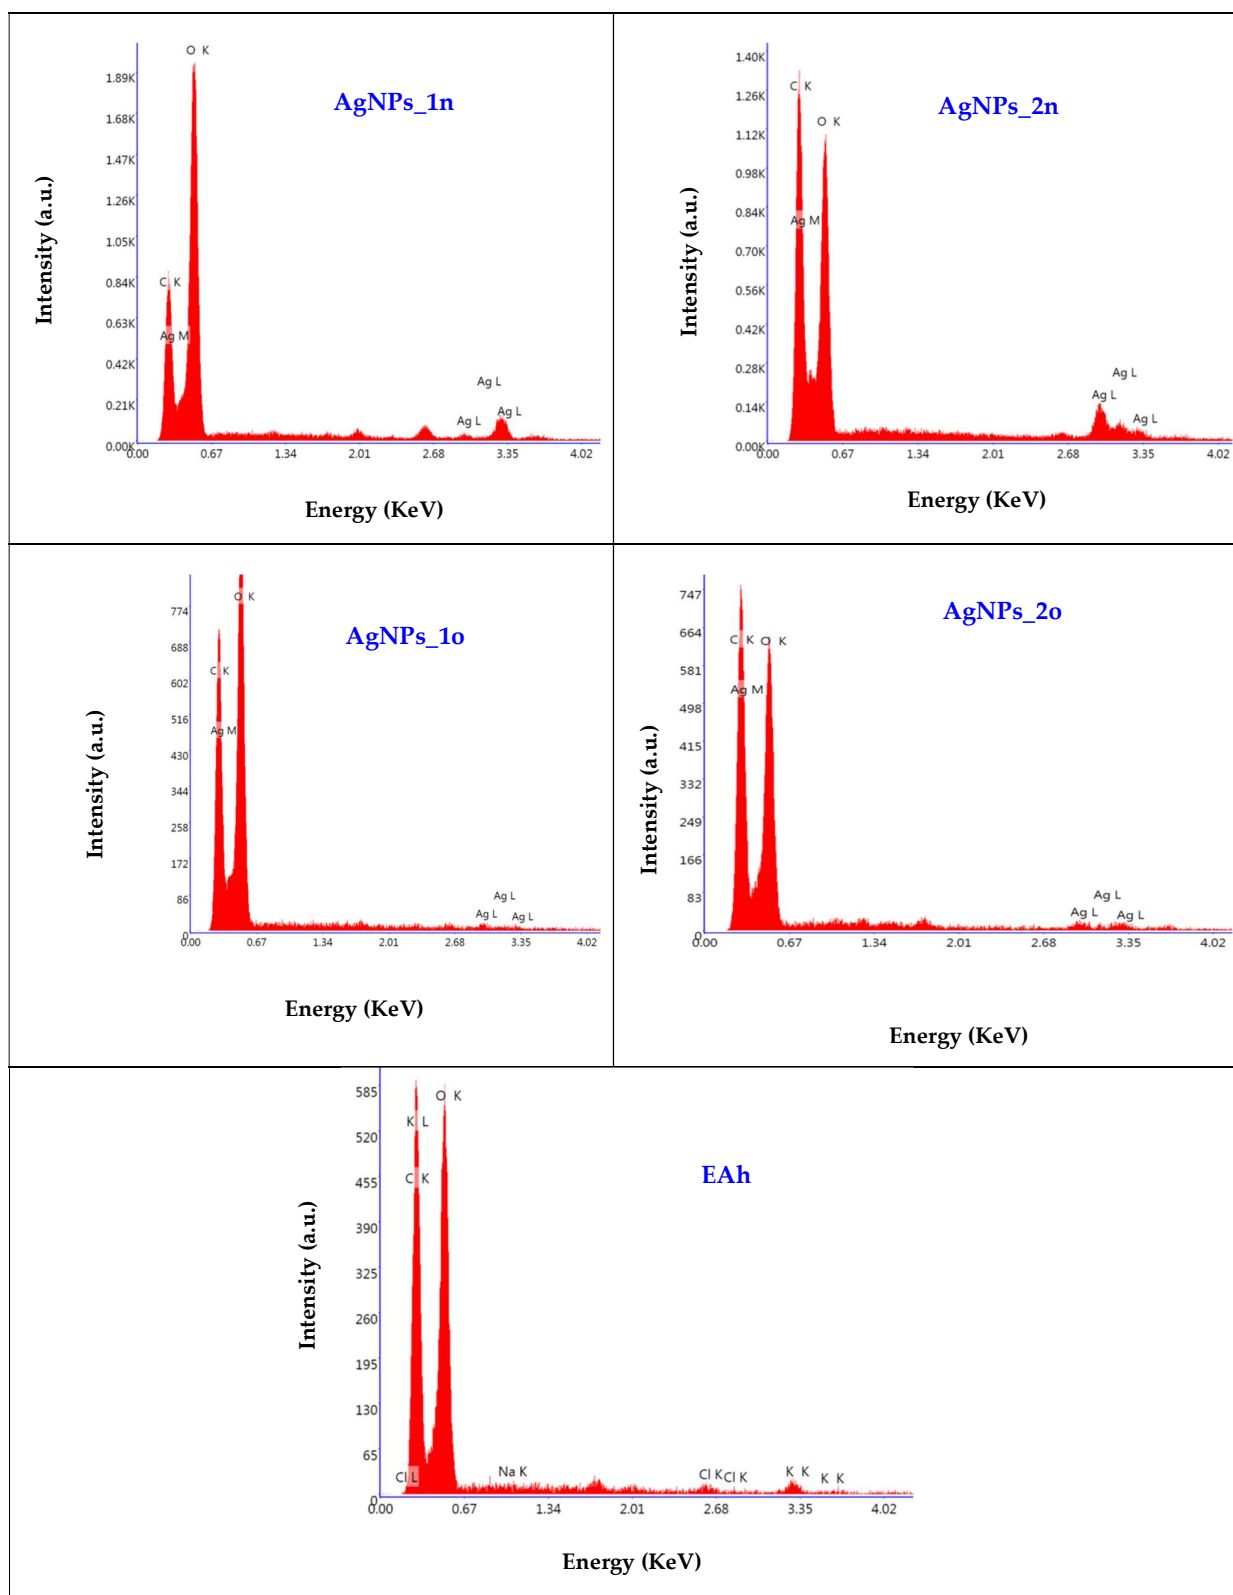

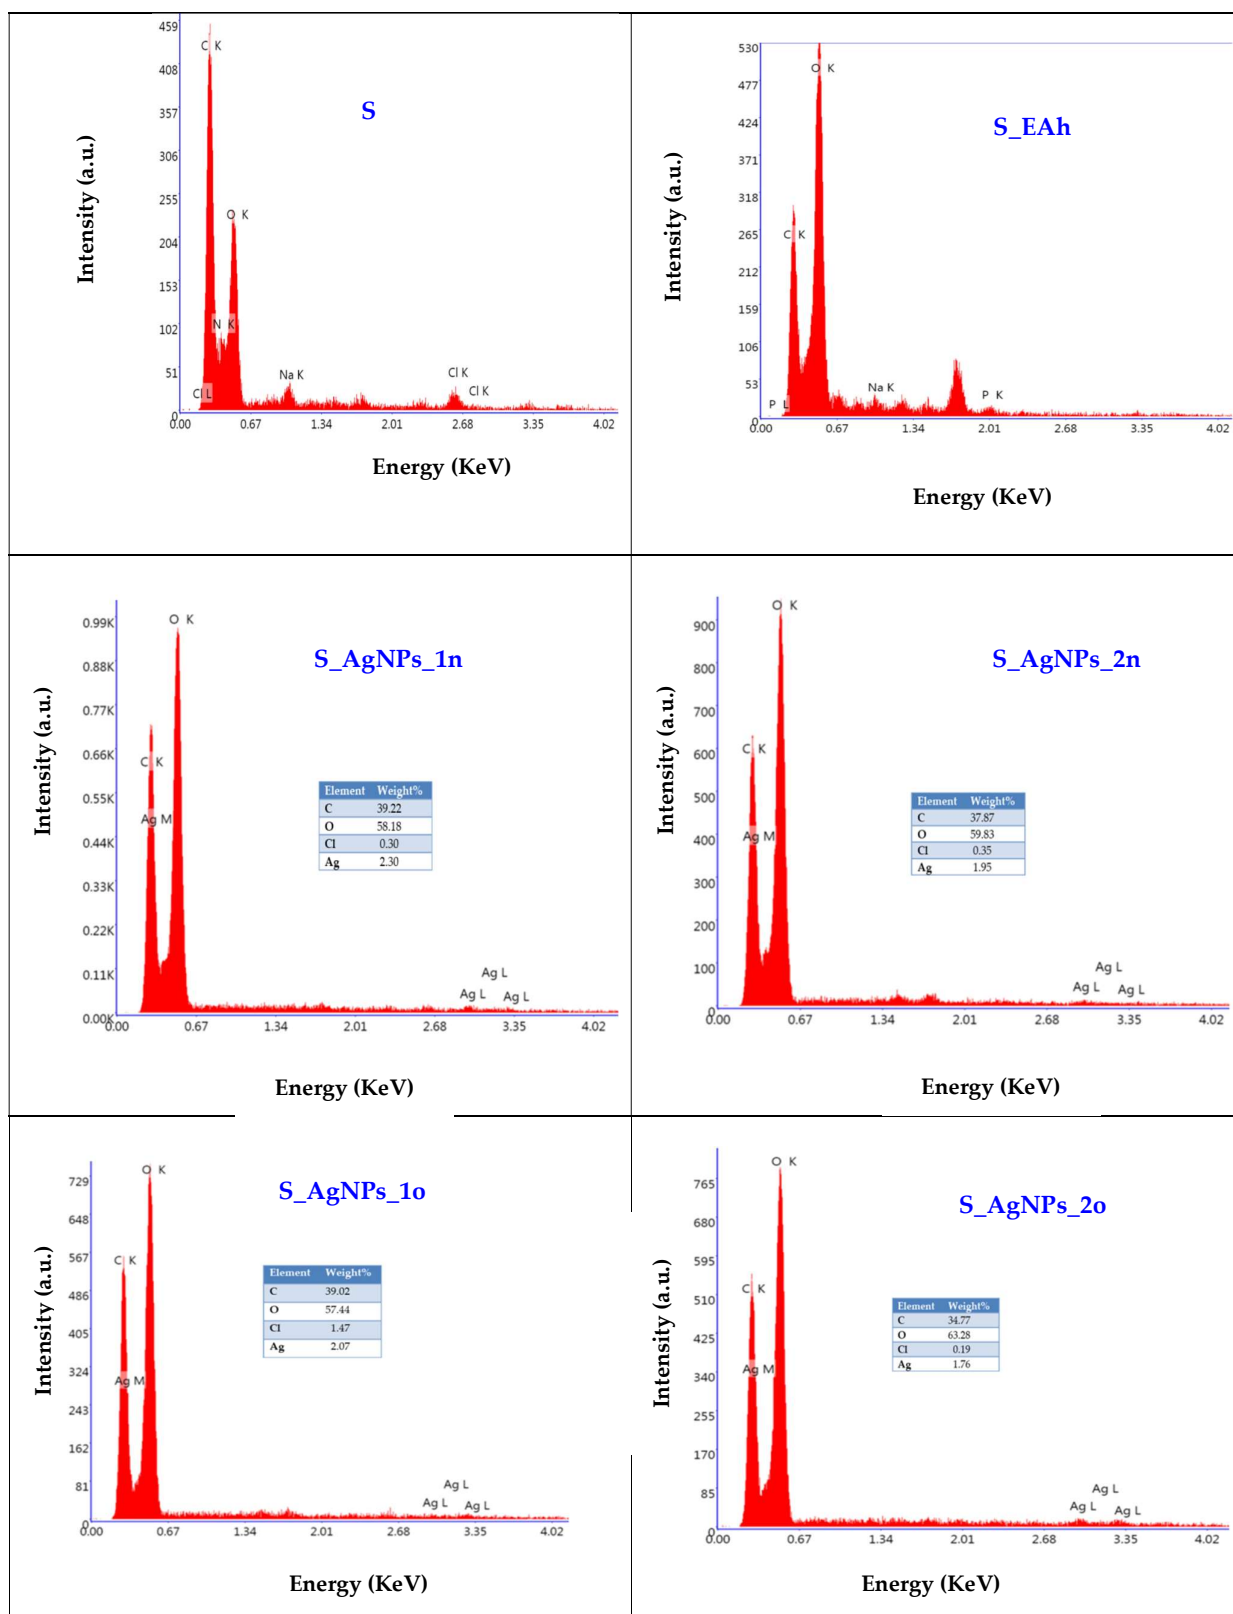

**Figure S1.** The EDX spectra of all samples: *Andropogon halepensis* extract (EAh) and *Andropogon*-derived AgNPs (AgNPs\_1n, AgNPs\_1o, AgNPs\_2n & AgNPs\_2o), spider silk (S) and spider silk composites with plant extract (S\_EAh) or with silver nanoparticles (S\_AgNPs\_1n, S\_AgNPs\_1o, S\_AgNPs\_2n & S\_AgNPs\_2o), at 10 kV.

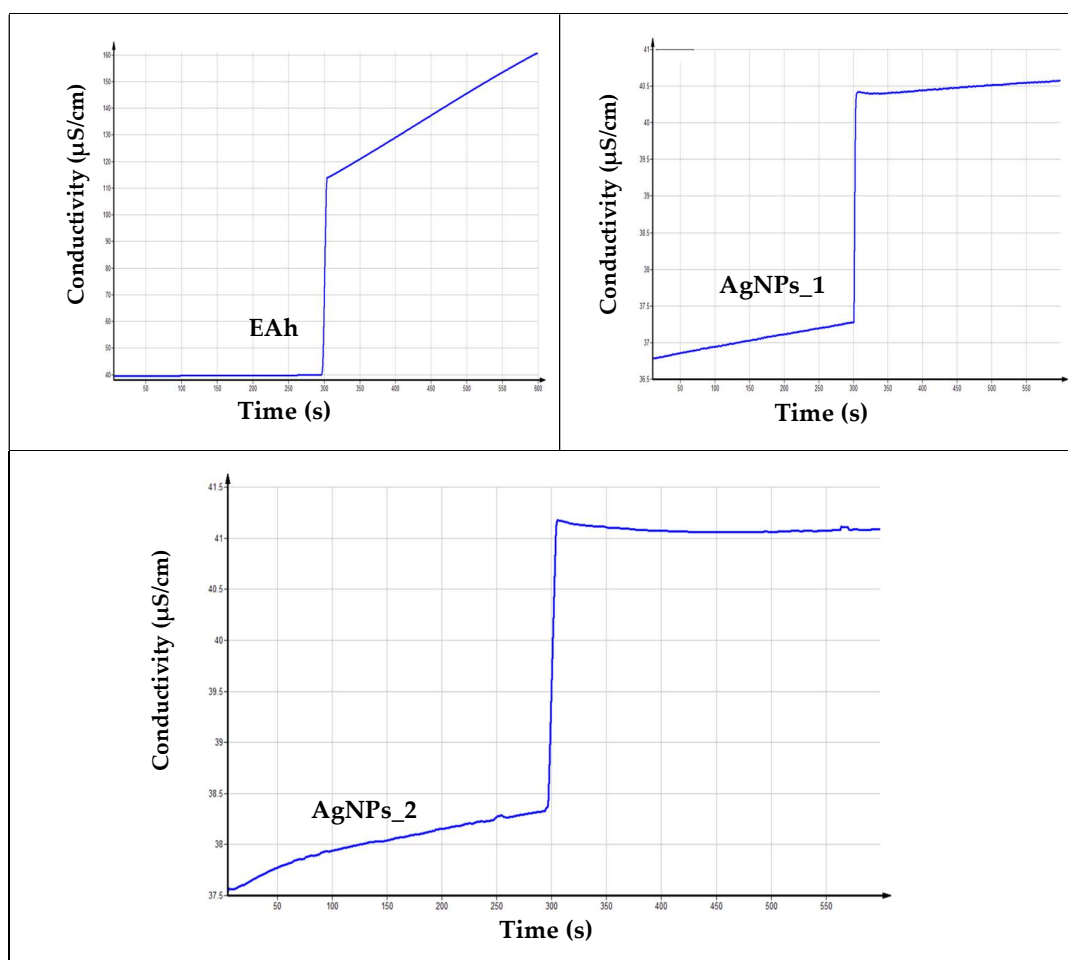

**Figure S2.** Investigation of urease inhibitory action of *the Andropogon halepensis* extract and of the developed phytometallic nanoparticles, estimated by the conductometric method.

## References

1. Barbinta-Patrascu, M.-E.; Chilom, C.; Nichita, C.; Zgura, I.; Iftimie, S.; Antohe, S. Biophysical insights on Jack bean urease in the presence of silver chloride phytonanoparticles generated from *Mentha piperita* L. leaves, *Rom.Rep.Phys.*, **2022**, *74*, 605.
2. Coates, J. Interpretation of Infrared Spectra, a Practical Approach. In *Encyclopedia of Analytical Chemistry*; Meyers, R.A., Eds.; John Wiley & Sons Ltd: Chichester, UK, 2000, pp. 1-23.
3. Kiseleva, A.; Nestor, G.; Ostman, J. R.; Kriuchkova, A.; Savin, A.; Krivoschapkin, P.; Krivoschapkina, E.; Seisenbaeva, G. A.; Kessler, V. G. Modulating Surface Properties of the *Linothele fallax* Spider Web by Solvent Treatment, *Biomacromolecules*, **2021**, *22*, 4945-4955. <https://doi.org/10.1021/acs.biomac.1c00787>
4. Goto, H.; Kikuchi, R.; Wang, A. Spider Silk/Polyaniline Composite Wire, *Fibers*, **2016**, *4*(2), 12. <https://doi.org/10.3390/fib4020012>
5. Gorinstein, S.; Park, Y.S.; Heo, B.G.; Namiesnik, J.; Leontowicz, H.; Leontowicz, M.; Ham, K.S.; Cho, J.Y.; Kang, S.G. A comparative study of phenolic compounds and antioxidant and antiproliferative activities in frequently consumed raw vegetables, *Eur. Food Res. Technol.*, **2009**, *228*, 903-911. <https://doi.org/10.1007/s00217-008-1003-y>.
6. Barbinta-Patrascu, M.-E.; Badea, N.; Bacalum, M.; Ungureanu, C.; Suica-Bunghez, I. R.; Iordache, S. M.; Pirvu, C.; Zgura, I.; Maraloiu, V.A. 3D hybrid structures based on biomimetic membranes and *Caryophyllus aromaticus* - "green" synthesized nano-silver with improved bioperformances, *Materials Science and Engineering: C*, **2019**, *101*, 120-137. DOI: 10.1016/j.msec.2019.03.069.



7. Seo, S.J.; Das, G.; Shin, H.S.; Patra, J.K. Silk Sericin Protein Materials: Characteristics and Applications in Food-Sector Industries, *Int. J. Mol. Sci.*, **2023**, *24*, 4951. <https://doi.org/10.3390/ijms24054951>.
8. Barbinta-Patrascu, M.-E.; Nichita, C.; Badea, N.; Ungureanu, C.; Bacalum, M.; Zgura, I.; Iosif, L.; Antohe, S. Biophysical aspects of bio-nanosilver generated from *Urtica dioica* Leaves and *Vitis vinifera* fruits' extracts, *Rom. Rep. Phys.* **2021**, *73*, 601.
9. Shameli, K.; Ahmad, M. B.; Jazayeri, S. D.; Shabanzadeh, P.; Sangpour, P.; Jahangirian, H.; Gharayebi, Y. Investigation of antibacterial properties silver nanoparticles prepared via green method, *Chemistry Central Journal*, **2012**, *6*, 73. doi:10.1186/1752-153X-6-73.

**Disclaimer/Publisher's Note:** The statements, opinions and data contained in all publications are solely those of the individual author(s) and contributor(s) and not of MDPI and/or the editor(s). MDPI and/or the editor(s) disclaim responsibility for any injury to people or property resulting from any ideas, methods, instructions or products referred to in the content.
